*La reindianización de América, siglo XIX*. Edited by LETICIA REINA. Colección América Nuestra: Caminos de Liberación, no. 43. Mexico City: Siglo Veintiuno; Centro de Investigaciones y Estudios en Antropología Social, 1997. Maps. Tables. Figures. Notes. Bibliographies. 382 pp. Paper.

*La reindianización de América* is a collection of 17 articles that focus on the processes of Indian social and cultural survival in Latin America during the nineteenth century. The regions studied include parts of Mexico, Guatemala, Ecuador, Peru, Bolivia, Chile, and Brazil. The articles clearly show that “reindianization” was the result of communal resistance to liberal programs that promoted individual land ownership and hacienda expansion. Indians countered these efforts not only through violent rebellion, but also via alliances with various elite groups that, enervated by intraelite struggles, sought support from Indian groups. Not all resistance was successful. Guillermo Palacio’s article on Brazil, entitled “Indios, cultivadores pobres y frontera agrícola en Pernambuco,” demonstrates that the expansion of sugar plantations overwhelmed the small Indian groups living on the frontier. Once their resistance collapsed, they fled and eventually merged with the non-Indian poor of Pernambuco. Certainly, one of the basic factors that explains the survival of Indian social organizations in Mexico, Guatemala, Ecuador, Peru, Bolivia, and Chile, in contrast to Brazil, is demographic: the peasants of the traditional (preconquest), densely inhabited, Indian core areas were much more likely to develop strategies of resistance and preserve their social organization than peasants elsewhere. In these core areas, the settlement of outsiders during the colonial period and the nineteenth century was minimal.

Reviewing each article is obviously impossible. But several stand out because of their “unexpected” perspective. Rather than focus on Indians living in their own communities, Mario Humberto Ruz’s article on “Etnicidad, territorio y trabajo en las fincas decimonónicas de Comitán, Chiapas,” reveals that on the coffee fincas workers created an Indian communal lifestyle through daily adaptation to the demands of their bosses. These acts of adaptation contributed to their solidarity and group identification as Indian, rather than their incorporation into the ladino world. Moreover, learning about and adopting practices of the non-Indian world did not mean that Indians automatically abandoned their Indian identity. The same theme of “dynamic adaptability” appears in the articles (all relating to Mexico) by Leticia Reina on the Zapotecs of the Isthmus of Tehuantepec, Cynthia Radding on the “campesinos indígenas” of Sonora, and Antonio Escobar on the Indian communities of the Huasteca.

Several articles show that the elite contributed to the continuance of Indian social organization, the passage of a liberal program to the contrary. In her study of Ayacucho, Peru, Cecilia Méndez notes that many liberal laws that sought to change Indian communities were never implemented. For immediate practical reasons, local elites saw greater advantages in preserving these communities. During economic downturns, hacendados depended on communities for labor and as outlets for their goods. Also, as a result of incessant intraelite conflict, Indians received arms from various governments.

Guy Thomson's review of the career of Juan Francisco Lucas, the caudillo of Puebla, Mexico during the 1850s and 1870s, illustrates how a local political boss could serve as a mediator between Indians and the liberal movement. By taking advantage of local Indian customs, Lucas not only supported liberal politicians with food and recruits, but also preserved a local Indian lifestyle. John Tutino's study of popular Christianity in the Valley of Mexico during the early nineteenth century reveals that veneration of the Virgin of Guadalupe served as another form of mediation between the creole elite and campesinos.

This collection reminds readers of the complex forms of interaction among national elites, local elites, and local peasants who were aware of their ethnic identity and political interests. Maps accompany each regional study, adding to the collection's usefulness.

ERWIN P. GRIESHABER, Mankato State University

*Murder and Justice in Frontier New Mexico, 1821–1846.* By JILL MOCHO. Albuquerque: University of New Mexico Press, 1997. Photographs. Maps. Notes. Glossary. Bibliography. Index. xiv, 245 pp. Cloth, \$50.00. Paper, \$19.95.

In *Murder and Justice*, Jill Mocho examines all 11 extant records of homicide prosecutions from the Mexican era of New Mexico. Her first aim is to illuminate social history, especially to the extent that witness statements and confessions shed light on the generally undocumented lower class. Her second purpose is to describe the operations of the New Mexico legal system as applied to murder prosecutions. She succeeds with the first goal but fails on the second.

In part, Mocho's inability to adequately describe the New Mexican legal system derives from the paucity of cases and the incompleteness of records. However, it also stems from her failure to read widely enough and to analyze legal materials. She appears to base her assumptions on the operation of the legal system on secondary authorities for the Spanish period, and concludes that the Mexican era was similar. She ignores, except for one passing reference, the laws of March 20, 1837, and May 23, 1837, that provided detailed rules for the operation of the courts. The prosecution of all but two of her homicides came after this legislation.

Furthermore, Mocho did not look beyond New Mexico. Had she looked at California, another frontier Mexican department, she would have seen my own detailed study of California's legal system during the Mexican period, *Law and Community on the Mexican California Frontier: Anglo-American Expatriates and the Clash of Legal Traditions, 1821–1846* (Norman, 1987). At numerous turns, comparison would confirm or challenge Mocho's analysis of the New Mexican legal system. Comparison would shed light on several major points: the number of homicides per capita, the administration of the death penalty, the educational and social levels of judges, the relative importance of community values and tradition over formal law, and the incomplete implementation of the formal legal system on the frontier.
